# Supplementary material for: Microbiota-driven interleukin-17-producing cells and eosinophils synergize to accelerate multiple myeloma progression
Source: PubMed Central journal article supplement (PMC6277390; doi:10.1038/s41467-018-07305-8), 2018-12-03
Supplement: 41467_2018_7305_MOESM1_ESM.pdf [file 41467_2018_7305_MOESM1_ESM.pdf]

## **SUPPLEMENTARY INFORMATION**

### **Microbiota-driven interleukin-17-producing cells and eosinophils synergize to accelerate multiple myeloma progression**

Arianna Calcinotto, Arianna Brevi, Marta Chesi, Roberto Ferrarese, Laura Garcia Perez, Matteo Grioni, Shaji Kumar, Victoria M. Garbitt, Meaghen E. Sharik, Kimberly J Henderson, Giovanni Tonon, Michio Tomura, Yoshihiro Miwa, Enric Esplugues, Richard A. Flavell, Samuel Huber, Filippo Canducci, Vincent S Rajkumar, P Leif Bergsagel & Matteo Bellone

**Supplementary Tables: 1**

**Supplementary Figures: 10**

**Supplementary Table 1. Patients' information**

| <b>Pts</b> | <b>DX at Collection Sample</b> | <b>Collection Sample Date</b> | <b>MM DX Date</b> | <b>Group</b>          |
|------------|--------------------------------|-------------------------------|-------------------|-----------------------|
| 1          | SMM                            | 3-Aug-04                      | 25-Jun-10         | Progression >3 years  |
| 2          | SMM                            | 11-Aug-05                     | 25-Jun-10         | Progression >3 years  |
| 3          | SMM                            | 28-Aug-06                     | 25-Jun-10         | Progression >3 years  |
| 4          | SMM                            | 20-Jul-07                     | 24-Apr-14         | Progression >3 years  |
| 5          | SMM                            | 23-Jul-09                     | 24-Apr-14         | Progression >3 years  |
| 6          | SMM                            | 8-Oct-07                      | 6-Apr-11          | Progression >3 years  |
| 7          | SMM                            | 27-Jan-06                     | 10-Mar-10         | Progression >3 years  |
| 8          | SMM                            | 29-Mar-05                     | 14-Sep-10         | Progression >3 years  |
| 9          | SMM                            | 13-Nov-06                     | 4-Sep-15          | Progression >3 years  |
| 10         | SMM                            | 24-Oct-05                     | 10-Sep-10         | Progression >3 years  |
| 11         | SMM                            | 18-Apr-06                     | 10-Sep-10         | Progression >3 years  |
| 12         | SMM                            | 28-Jun-06                     | 1-Jun-10          | Progression >3 years  |
| 13         | SMM                            | 16-Aug-07                     | 25-Jun-10         | Progression < 3 years |
| 14         | SMM                            | 25-Sep-08                     | 25-Jun-10         | Progression < 3 years |
| 15         | SMM                            | 19-May-06                     | 24-Nov-08         | Progression < 3 years |
| 16         | SMM                            | 21-Aug-07                     | 24-Nov-08         | Progression < 3 years |
| 17         | SMM                            | 3-Oct-08                      | 4-Dec-09          | Progression < 3 years |
| 18         | SMM                            | 13-Dec-05                     | 12-Mar-07         | Progression < 3 years |
| 19         | SMM                            | 7-Oct-08                      | 14-Oct-09         | Progression < 3 years |
| 20         | SMM                            | 30-Jun-11                     | 11-Jan-12         | Progression < 3 years |
| 21         | SMM                            | 26-Sep-07                     | 27-Aug-08         | Progression < 3 years |
| 22         | SMM                            | 27-Nov-12                     | 2-Mar-13          | Progression < 3 years |
| 23         | SMM                            | 2-Dec-10                      | 6-Apr-11          | Progression < 3 years |
| 24         | SMM                            | 9-Jun-10                      | 24-May-11         | Progression < 3 years |
| 25         | SMM                            | 2-Sep-08                      | 10-Mar-10         | Progression < 3 years |
| 26         | SMM                            | 19-Jun-09                     | 20-Jul-10         | Progression < 3 years |
| 27         | MGUS                           | 2-Feb-11                      | 6-Feb-13          | Progression < 3 years |
| 28         | SMM                            | 3-Mar-09                      | 29-Sep-09         | Progression < 3 years |
| 29         | SMM                            | 10-Oct-06                     | 7-Jul-08          | Progression < 3 years |
| 30         | SMM                            | 15-Aug-05                     | 31-Jul-07         | Progression < 3 years |
| 31         | SMM                            | 30-Nov-04                     | 13-Apr-05         | Progression < 3 years |
| 32         | SMM                            | 18-Oct-07                     | 16-Sep-08         | Progression < 3 years |
| 33         | SMM                            | 23-May-05                     | 1-Dec-05          | Progression < 3 years |
| 34         | SMM                            | 24-Apr-07                     | 8-Feb-10          | Progression < 3 years |
| 35         | MGUS                           | 31-Jul-09                     | 19-Feb-10         | Progression < 3 years |
| 36         | SMM                            | 12-Jun-09                     | 23-Dec-09         | Progression < 3 years |
| 37         | MM                             | 4-Dec-09                      | 4-Dec-09          | Before Treatment      |
| 38         | MM                             | 14-Oct-09                     | 14-Oct-09         | Before Treatment      |
| 39         | MM                             | 28-Apr-10                     | 28-Apr-10         | Before Treatment      |
| 40         | MM                             | 27-Aug-08                     | 27-Aug-08         | Before Treatment      |
| 41         | MM                             | 4-Apr-11                      | 6-Apr-11          | Before Treatment      |
| 42         | MM                             | 24-May-11                     | 24-May-11         | Before Treatment      |
| 43         | MM                             | 14-Sep-10                     | 14-Sep-10         | Before Treatment      |
| 44         | MM                             | 11-Mar-08                     | 11-Mar-08         | Before Treatment      |
| 45         | MM                             | 20-Jul-10                     | 20-Jul-10         | Before Treatment      |
| 46         | MM                             | 6-Feb-13                      | 6-Feb-13          | Before Treatment      |
| 47         | MM                             | 7-Jul-08                      | 7-Jul-08          | Before Treatment      |
| 48         | MM                             | 20-Sep-10                     | 10-Sep-10         | Before Treatment      |
| 49         | MM                             | 9-Feb-10                      | 8-Feb-10          | Before Treatment      |
| 50         | MM                             | 7-Aug-09                      | 24-Nov-08         | After Treatment       |
| 51         | MM                             | 12-Nov-07                     | 12-Mar-07         | After Treatment       |
| 52         | MM                             | 23-Sep-14                     | 24-Apr-14         | After Treatment       |
| 53         | MM                             | 18-May-12                     | 11-Jan-12         | After Treatment       |
| 54         | MM                             | 3-Jun-14                      | 11-Jan-12         | After Treatment       |
| 55         | MM                             | 3-Jan-12                      | 6-Apr-11          | After Treatment       |
| 56         | MM                             | 12-Jun-12                     | 24-May-11         | After Treatment       |
| 57         | MM                             | 16-Feb-15                     | 24-May-11         | After Treatment       |

|    |    |           |           |                 |
|----|----|-----------|-----------|-----------------|
| 58 | MM | 10-Nov-05 | 13-Apr-05 | After Treatment |
| 59 | MM | 14-Mar-11 | 10-Sep-10 | After Treatment |
| 60 | MM | 21-Mar-12 | 8-Feb-10  | After Treatment |

Abbreviations: Pts, patients; DX, Diagnosis.

### Supplementary Figure 1

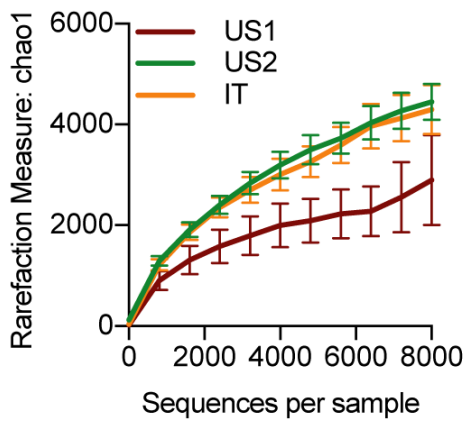

### Microbiome analyses of stool samples from mice housed in the different animals facilities.

CHAO1 index analysis of fecal microbiota from Vk\*MYC and WT littermates housed in US1 (n=8 of biologically independent mice), US2 (n=16) and IT (n=8) animal facilities.

## Supplementary Figure 2

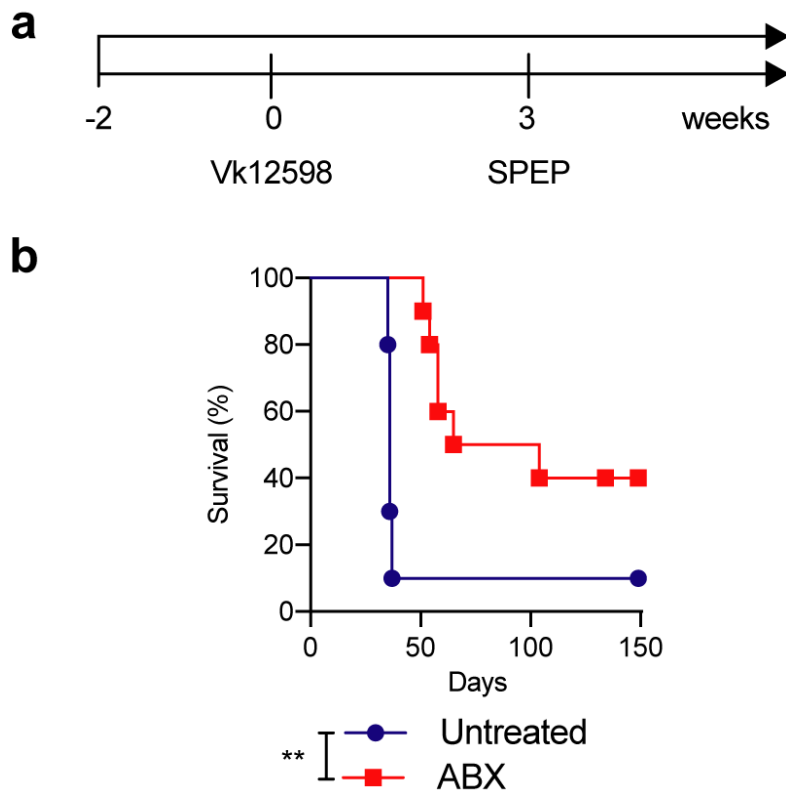

**Antibiotic treatment improves the overall survival in t-Vk\*MYC MM mice.** **a** Schematic representation of the experiment reported in Fig. 1d. Mice were monitored for M-spike appearance as described in the Methods section. **b** Survival (Kaplan-Meier plot) of t-Vk\*MYC MM mice maintained or not under antibiotic in drinking water (n=10/group) is reported. Long-rank (Mantel-Cox) test: \* $P=0.0027$

### Supplementary Figure 3

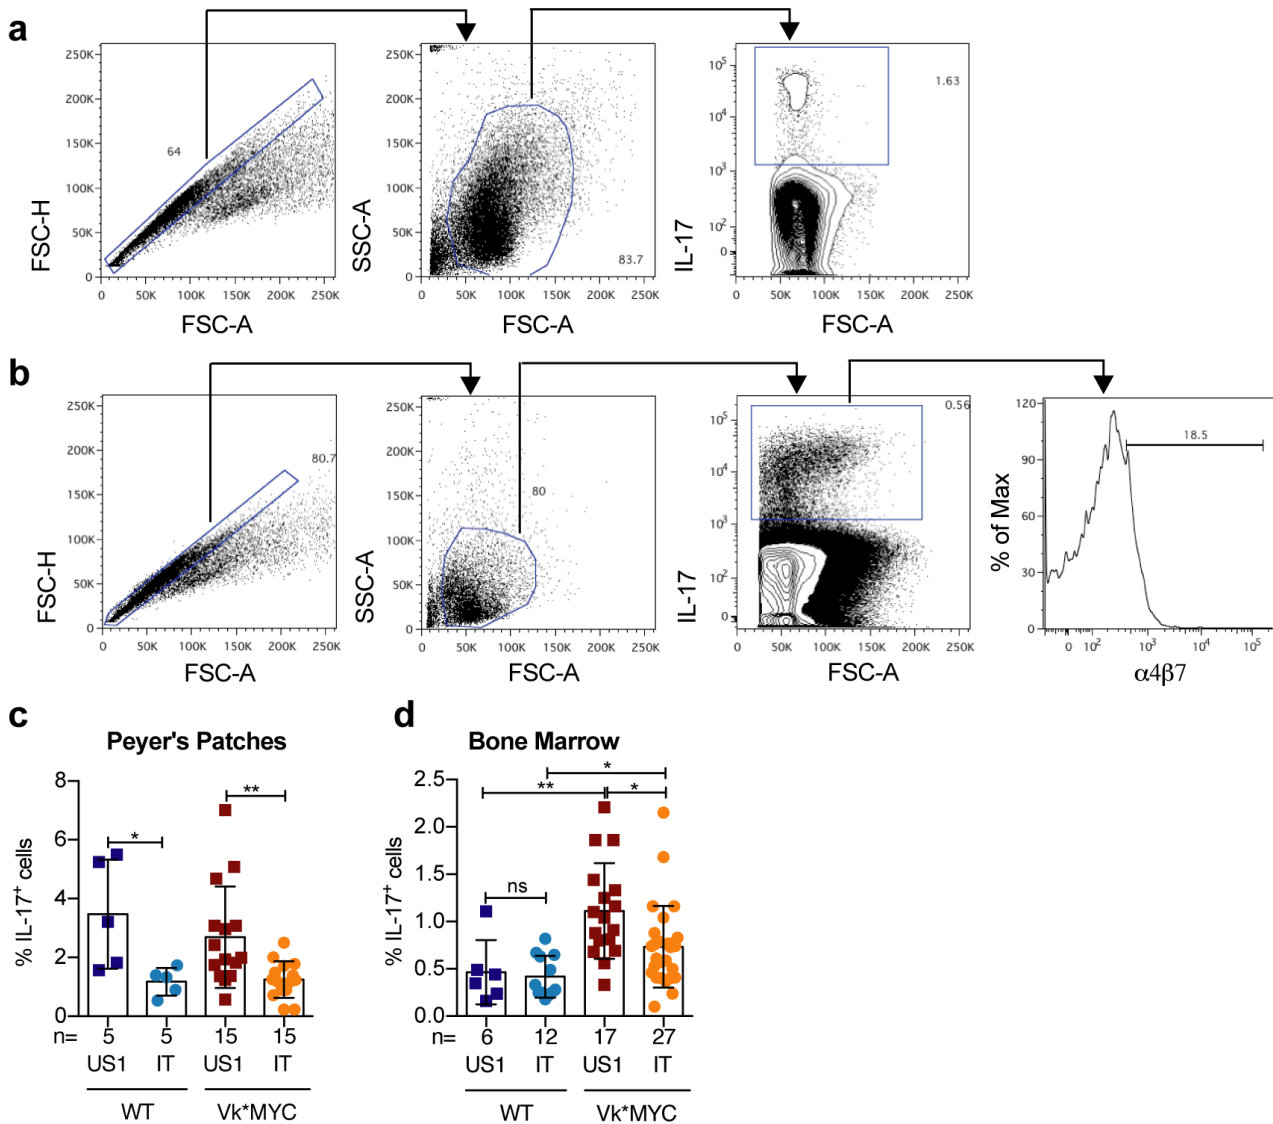

**IL-17<sup>+</sup> cells are enriched in the Peyer's patches and BM of Vk\*MYC mice housed in the US1 animal facility.** Gating strategy relative to IL-17<sup>+</sup> cells in the Peyer's Patches (**a**) for the data reported in Fig. 1f, g, h and Suppl. Fig 2c, and in the BM (**b**) for the data reported in Fig. 1i, j, k, Fig. 2c, d, Fig. 6c, Suppl. Fig 2d, Suppl. Fig. 5a, b, c, d and Suppl. Fig. 10b. Frequency of IL-17<sup>+</sup> cells in the Peyer's Patches (**c**) and BM (**d**) from Vk\*MYC mice and sex- and age-matched WT littermates housed in US1 or in IT AF. Mean  $\pm$  SD of three independent experiments. Unpaired *t* test: \**P* < 0.05; \*\**P* < 0.01; \*\*\**P* < 0.001.

## Supplementary Figure 4

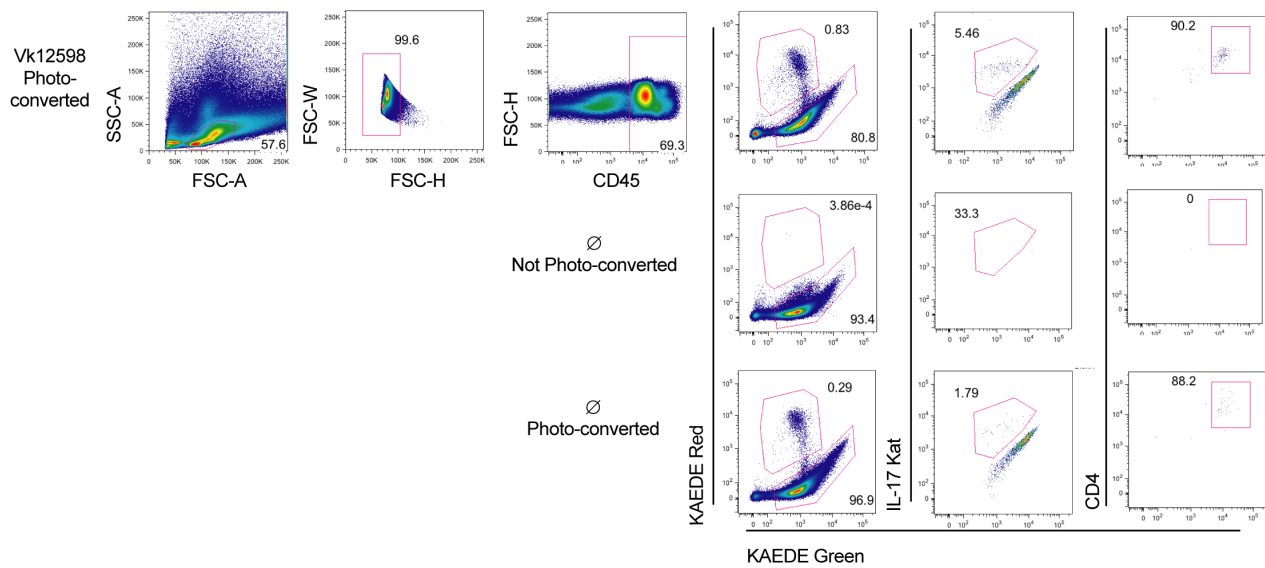

**Gating strategy relative to the quantification of gut-experienced Th17 cells in photoconverted Kaede mice.** Representative dot plots of BM cells from treated, photoconverted Kaede mice, untreated, not photoconverted Kaede mice and untreated, photoconverted Kaede mice (Fig. 1l and m). Right panels show frequency of IL-17A FP635<sup>+</sup> cells within the KAEDE red positive and KAEDE red negative CD4<sup>+</sup> T cells.

**Supplementary Figure 5**

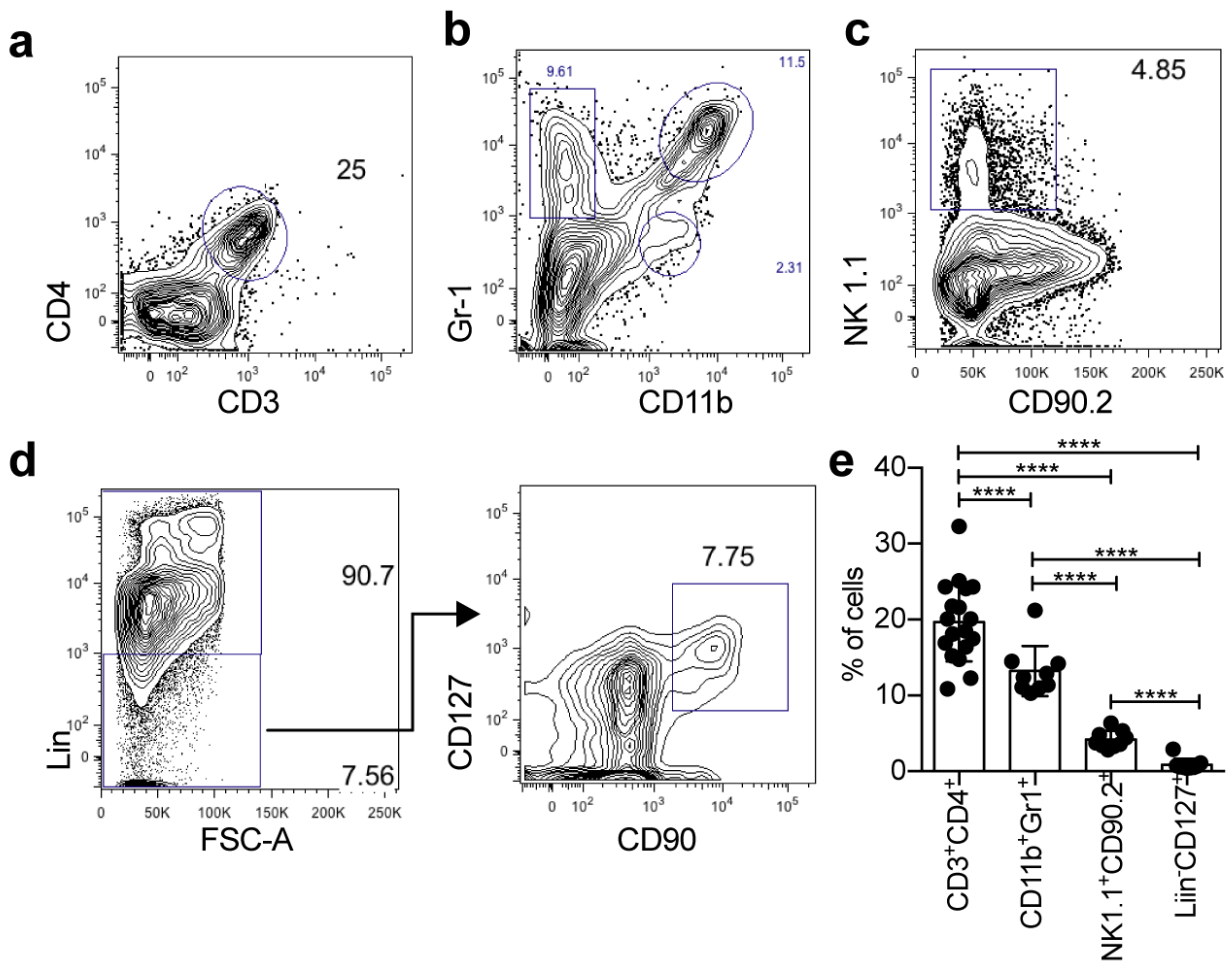

**Characterization of IL-17<sup>+</sup> cells in the BM of Vk\*MYC and WT mice.** Representative plots of CD3<sup>+</sup>CD4<sup>+</sup> (a), CD11b<sup>+</sup>Gr-1<sup>+</sup> (b), NK1.1<sup>+</sup>CD90.2<sup>-</sup> (c) and CD90<sup>+</sup>CD127<sup>+</sup> cells (d) pre-gated on Lin<sup>-</sup> cells (lower left panel), all gated on IL-17<sup>+</sup> cells, in the BM of SPF Vk\*MYC mice. Dead cells were excluded by live/dead staining. **e** Panels report the percentage of the different subsets. (CD3<sup>+</sup>CD4<sup>+</sup> n=18; CD11b<sup>+</sup>Gr-1<sup>+</sup> n=9; NK1.1<sup>+</sup>CD90.2<sup>-</sup> n=9; Lin<sup>-</sup>CD127<sup>+</sup> n=9). Mean ± SD of three independent experiments. One-way Anova P < 0.0001. Unpaired *t* test: \*P < 0.05; \*\*P < 0.01; \*\*\*P < 0.001; \*\*\*\*P < 0.0001.



### Supplementary Figure 6

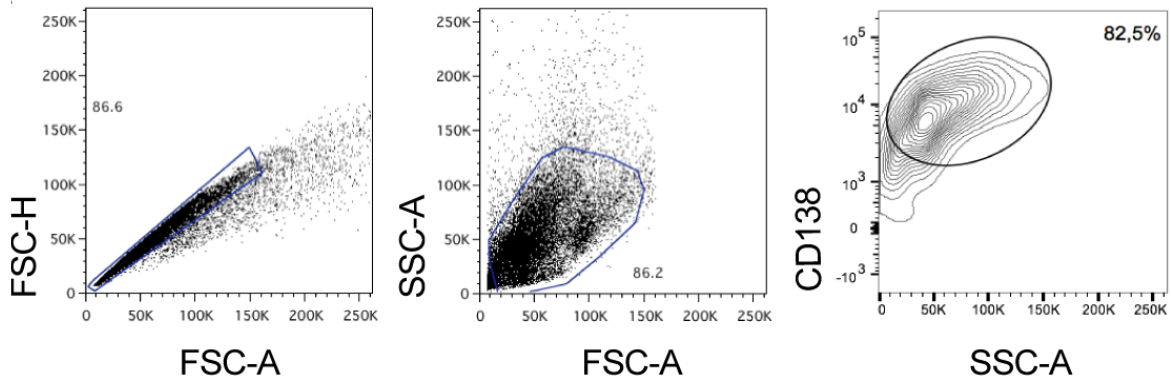

**Gating strategy relative to BM-derived CD138<sup>+</sup> plasma cells.** Gating strategy for the flow-cytometry analyses of CD138<sup>+</sup> plasma cells obtained from the BM of Vk\*MYC mice, and reported in Fig. 3b, c, d.

**Supplementary Figure 7**

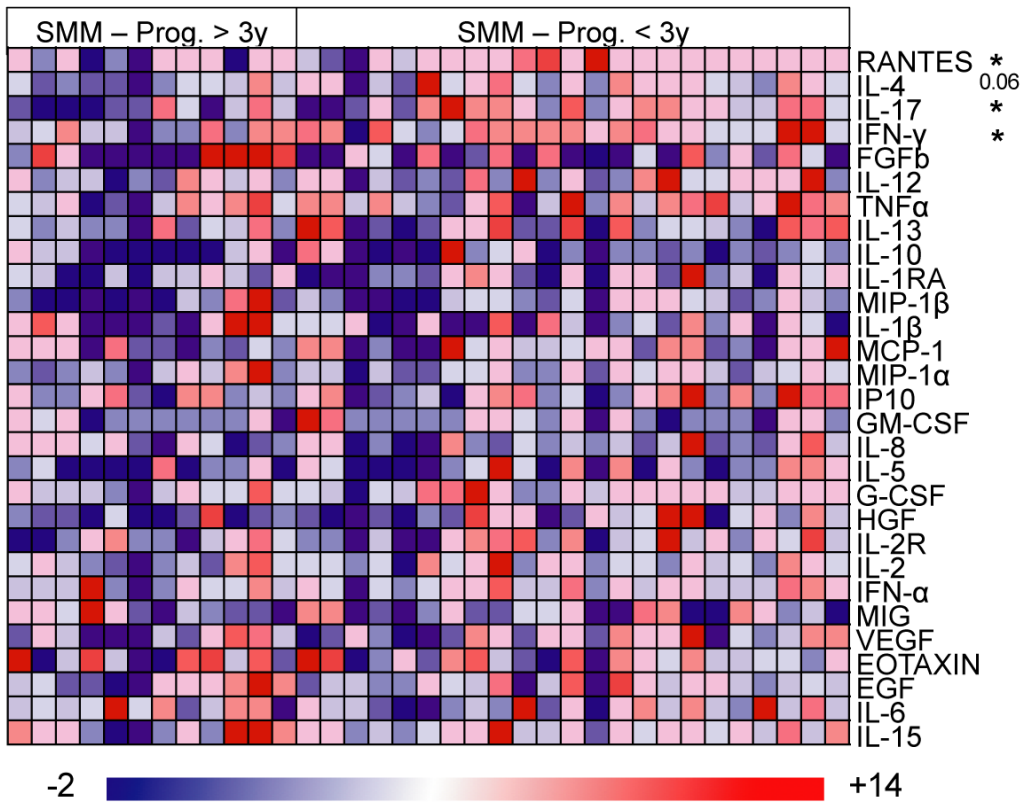

**Quantification of cytokines and chemokines in the BM serum obtained from SMM patients.**

Cytokines and chemokines were quantified in the BM sera of SMM patients that progress to MM < 3 years, or > 3 years as described in the Materials and Methods section. The Heat map reports the relative expression (log base 2) of the indicated BM soluble factors ranked based on their differential expression between the two groups.

## Supplementary Figure 8

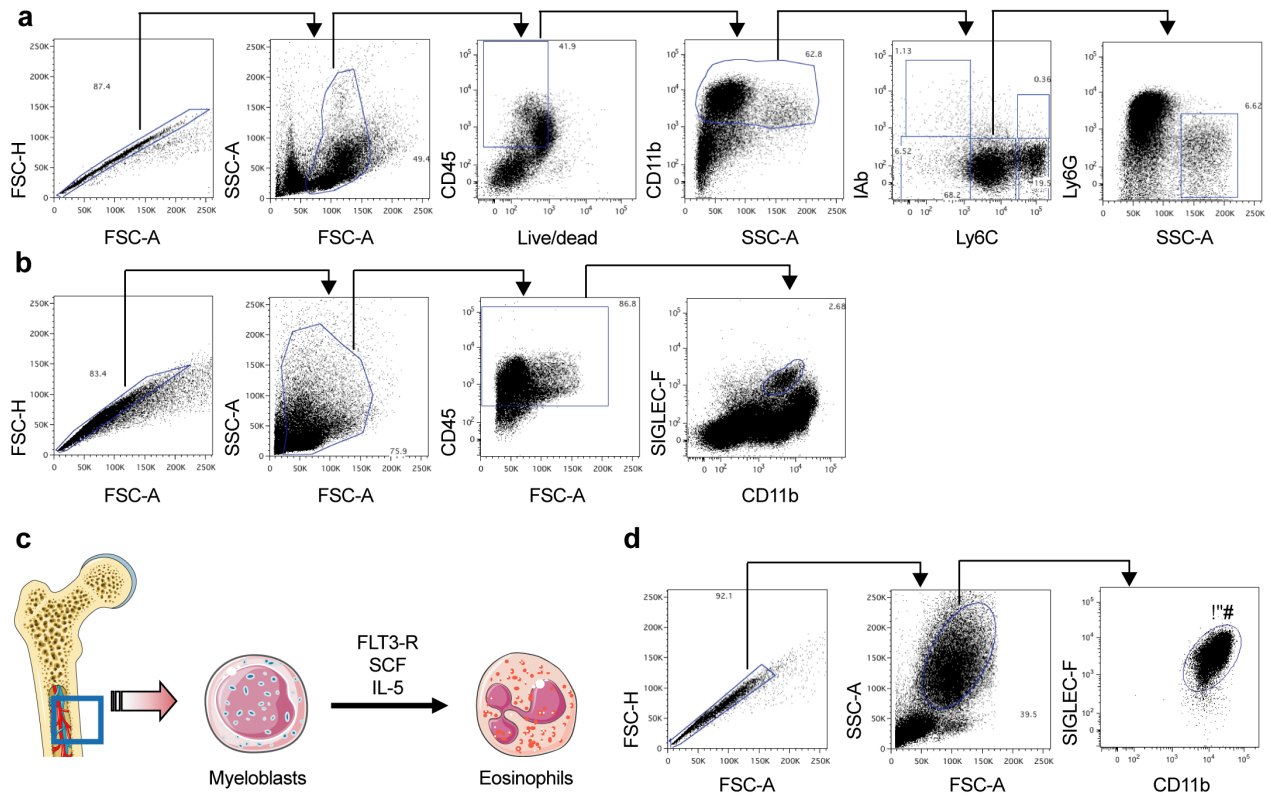

**Quantification of BM eosinophils and their *in vitro* differentiation.** **a** Gating strategy relative to the quantification of the frequency of eosinophils in the BM of  $V\kappa^*MYC$ ,  $V\kappa^*MYC$  IL-17ko and  $t-V\kappa^*MYC$  MM bearing mice in Fig. 5a and 6d. **b** Gating strategy relative to the quantification of IL-6-producing eosinophils from the BM of  $V\kappa^*MYC$ ,  $V\kappa^*MYC$  IL-17ko and  $t-V\kappa^*MYC$  MM bearing mice in Figs. 5b, c and d. **c** Graphic representation of the *in vitro* differentiation of BM derived eosinophils, (see Materials and Methods section for further information). **d** Representative gating strategy of BM derived eosinophils after 12 days of culture with the described cytokines, relative to data reported in Figs. 5e, f, g, h, and i.

## Supplementary Figure 9

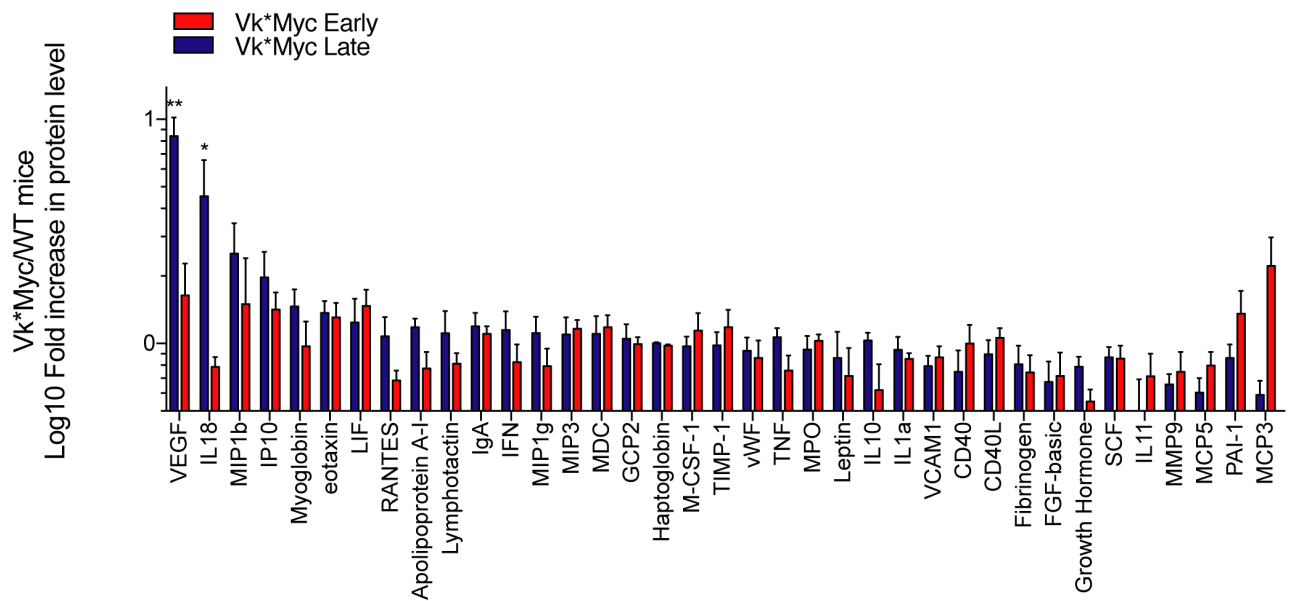

**Quantification of cytokines and chemokines in the BM of Vk\*MYC mice.** Cytokines and chemokines were quantified in the BM of sex- and age-matched Early-MM (n=7), Late-MM Vk\*MYC (n=5) and WT mice (n=5). The graph reports the relative amount (log base 10) of the indicated soluble factors normalized to the values obtained in the BM of WT mice. Unpaired t-test \*P<0.05;\*\*P<0.002.

**Supplementary Figure 10**

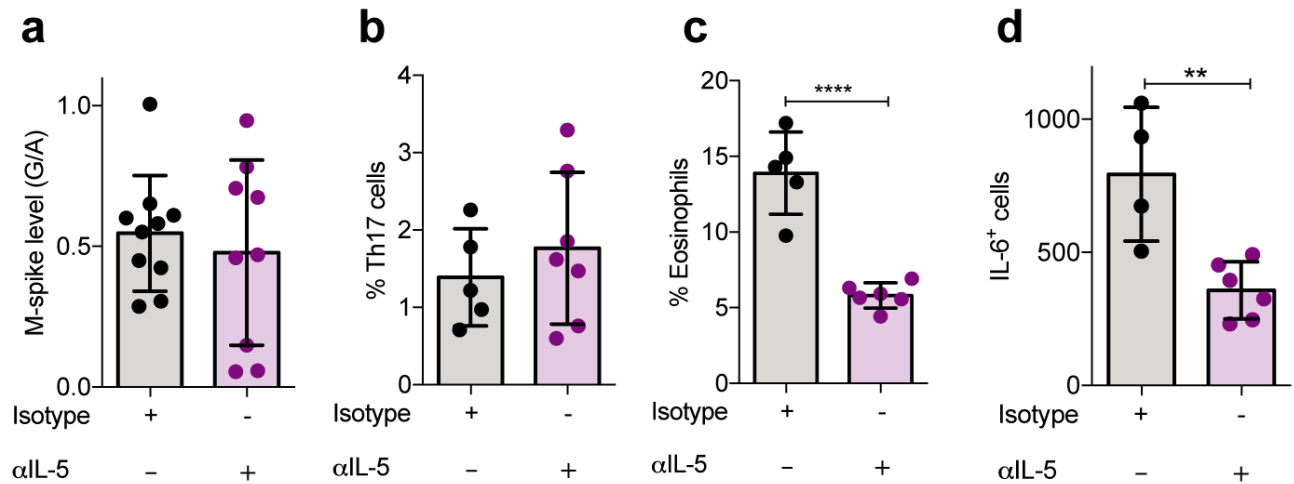

**Treatment with anti-IL-5 antibodies does not impact disease progression in t-Vk\*MYC MM mice.** As indicated in the Material and Methods section, t-Vk\*MYC MM mice were treated with anti-IL-5 antibodies ( $\alpha$ IL-5), and euthanized for M-spike detection and BM analysis five weeks later. **a** M-spike levels are expressed as total gamma globulins/albumin ratio (G/A) in t-Vk\*MYC MM mice within the indicated cohort at the time of sacrifice (Isotype n=10,  $\alpha$ IL-5 n=9). **b** Frequency of Th17 cells in the indicated cohort (Isotype n=5,  $\alpha$ IL-5 n=7). **c** Frequency of eosinophils in the indicated cohort (Isotype n=5,  $\alpha$ IL-5 n=6). Each dot represents an individual mouse. Data are reported as mean  $\pm$  SD. Unpaired *t* test: \*\*\*\**P* <0.0001. **d** Number of IL-6<sup>+</sup> eosinophils in the indicated cohort (Isotype n=5,  $\alpha$ IL-5 n=6). Unpaired *t* test: \*\**P* <0.01.
